# Supplementary material for: Low Salivary Amylase Gene (AMY1) Copy Number Is Associated with Obesity and Gut Prevotella Abundance in Mexican Children and Adults
Source: MDPI journal article supplement (doi:10.3390/nu10111607), 2018-11-01
Supplement: s1 [file s1]

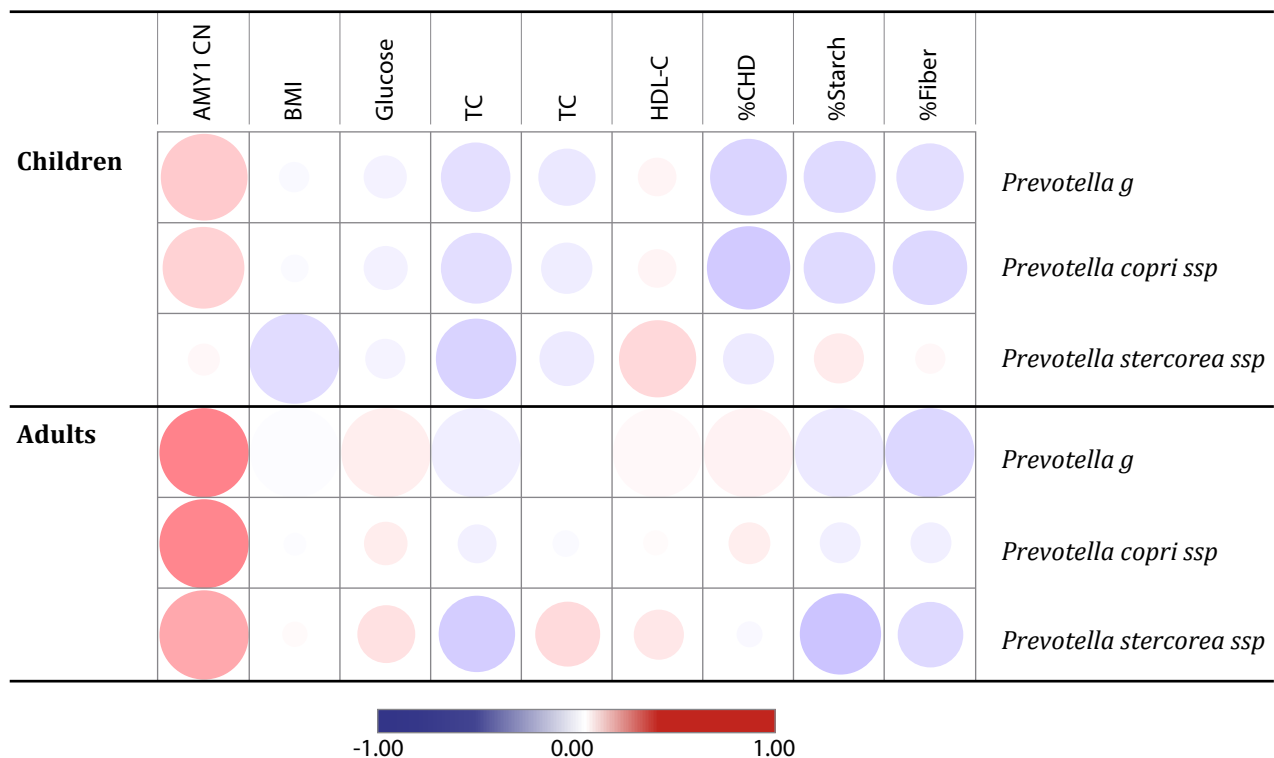

**Fig S1. Correlations of *Prevotella/Enterobacteria* abundances with AMY1 CN, metabolic parameters and dietary carbohydrate intake.** The correlation matrix depicts positive correlations in red and negative correlation in blue. The color scale indicates estimated Pearson's correlation coefficient values. Statistical significance of each correlation is proportional to the size of the circle.
